# Supplementary material
Source: HighWire-hosted journal article supplement (https://ez-admanager.com/highwire/filestream/136540/field_highwire_adjunct_files/0/devaux_800.pdf)
Supplement: devaux_800.pdf [file devaux_800.pdf]

# 神经束蛋白-155 IgG4在慢性炎性脱髓鞘性 多发性神经病中的意义

Jérôme J. Devaux, PhD; Yumako Miura, PhD; Yuki Fukami, MD; Takayuki Inoue, PhD; Constance Manso, BSc;  
Maya Belghazi, PhD; Kenji Sekiguchi, MD, PhD; Norito Kokubun, MD, PhD; Hiroo Ichikawa, MD, PhD;  
Anna Hiu Yi Wong, MRCP; Nobuhiro Yuki, MD, PhD

**目的:** 旨在报道日本抗神经束蛋白-155 (neruofascin-155, NF155) 免疫球蛋白 G4 (immunoglobulin G4, IgG4) 抗体阳性的慢性炎性脱髓鞘性多发性神经病 (chronic inflammatory demyelinating polyneuropathy, CIDP) 患者的临床和血清学特征。

**方法:** 通过酶联免疫吸附法 (ELISA) 检测了 533 例 CIDP 患者血清中的抗 NF155 IgG4 抗体。检测 IgG 抗体与中枢神经和周围神经的结合情况。

**结果:** 38 例 (7%) CIDP 患者中检测到抗 NF155 IgG4 抗体, 但在其他疾病对照以及健康受试者中未发现此抗体。与 100 例抗 NF155 IgG4 抗体阴性 CIDP 患者相比较, 这些患者起病时更年轻。其中, 28 例 (74%) 表现为感觉性共济失调, 16 例 (42%) 表现为震颤, 5 例 (13%) 表现为小脑性共济失调合并眼球震颤, 3 例 (8%) 有中枢神经脱髓鞘病灶, 25 例中有 20 例 (80%) 对静脉注射免疫球蛋白应答差。与抗体阴性的 CIDP 患者 (n = 100) 相比较, 抗体阳性患者出现此类临床症状的几率更加频繁, 具统计学意义。抗 NF155 IgG4 抗体对中枢神经和周围神经结侧区的结合力相似。

**结论:** 抗 NF155 IgG4 抗体与 CIDP 的一个亚组相关, 此亚组患者可表现为年轻起病、共济失调、震颤、中枢神经脱髓鞘、对静脉注射免疫球蛋白应答差等特征。此自身抗体可作为一个生物标记物以改进患者诊断和指导治疗。

**Neurology® 2016;86:800–807**

(陈康宁 审校)

## 认识并预防癫痫相关的死亡 一项行动呼吁

Orrin Devinsky, MD; Tanya Spruill, PhD; David Thurman, MD, PhD; Daniel Friedman, MD, MSc

因癫痫发作、癫痫、抗癫痫治疗直接或间接原因, 癫痫导致较高的过早死亡率。尽管癫痫猝死 (sudden unexpected death, SUDEP) 占癫痫相关死亡的比例不到一半, 但 SUDEP 继卒中后第二位的潜在寿命损失年的神经病学因素。某些癫痫群体尤其易感: 如那些社会经济地位较低的患者以及那些伴随精神疾病的患者较对照组的死亡率更高。尽管癫痫相关死亡是一个证据明显的、重要的公共健康问题, 然而在评估和预防癫痫相关死亡方面做得努力仍然不够。我们讨论了导致 SUDEP 估计不足的影响因素和其他引起死亡的癫痫相关因素。我们建议, 有必要对因癫痫直接因素 (如 SUDEP、溺水)、急性症状性发作和癫痫间接因素 (如自杀、抗癫痫药物治疗的慢性影响) 导致的死亡进行系统分类。

准确地评估癫痫相关死亡的频率对于支持预防干预的开发和评价非常必要。我们建议从药物治疗依从性、精神并发症以及其他可校正的风险因素等方面开展教育性干预措施和公共卫生活动, 这或许可以降低癫痫相关的病死率。在美国, 婴儿猝死症和火灾导致的死亡人数远少于癫痫, 然而有关这两方面的教育活动却已广泛开展。在预防癫痫相关死亡方面我们做的太少。每一位癫痫患者和癫痫专科医师都需要明确: 控制癫痫发作将会挽救生命。**Neurology® 2016;86:779–786**

(陈康宁 审校)
